# Supplementary material for: A phase 3 study (PATHWAY) of palbociclib plus tamoxifen in patients with HR-positive/HER2-negative advanced breast cancer
Source: PubMed Central journal article supplement (PMC11341958; doi:10.1038/s41523-024-00684-w), 2024-08-22
Supplement: 41523_2024_684_MOESM1_ESM.pdf [file 41523_2024_684_MOESM1_ESM.pdf]

## Supplementary Appendix

### Table of contents

|                                                                                                                          |
|--------------------------------------------------------------------------------------------------------------------------|
| List of Collaborators                                                                                                    |
| <b>Supplementary Figure 1.</b> Trial design.                                                                             |
| <b>Supplementary Table 1.</b> Best overall response based on investigator assessment.                                    |
| <b>Supplementary Table 2.</b> Serious adverse events related to study treatment, by severity grade and type.             |
| <b>Supplementary Table 3.</b> Adverse events leading to treatment discontinuation, by severity grade and type.           |
| <b>Supplementary Table 4.</b> Follow-up anticancer therapy received by 3% or more of patients in either treatment group. |
| CONSORT Checklist                                                                                                        |

List of Collaborators

**Japan**

| Principal Investigator<br>(P) : Previous Principal Investigator | Sub-Investigator<br>(P) : Previous Sub-Investigator                                                                                                                                                                                                                                                                                                                                                                                                                                                                                            | Study Conducted at Address(es)                                                       |
|-----------------------------------------------------------------|------------------------------------------------------------------------------------------------------------------------------------------------------------------------------------------------------------------------------------------------------------------------------------------------------------------------------------------------------------------------------------------------------------------------------------------------------------------------------------------------------------------------------------------------|--------------------------------------------------------------------------------------|
| Kan Yonemori<br>Kenji Tamura (P)                                | Yasuhiro Fujiwara (P)<br>Chikako Shimizu (P)<br>Kan Yonemori (P)<br>Akihiko Shimomura (P)<br>Emi Noguchi (P)<br>Kazuki Sudo<br>Tadaaki Nishikawa<br>Hitomi Okuma<br>Hiromitsu Kitayama (P)<br>Takuji Seo (P)<br>Maki Tanioka (P)<br>Yohei Otake (P)<br>Yuki Kojima (P)<br>Tatsunori Shimoi<br>Toshihiro Okuya (P)<br>Shu Yazaki (P)<br>Yohei Chiba (P)<br>Kasumi Yamamoto (P)<br>Shosuke Kita<br>Chiharu Mizoguchi (P)<br>Momoko Tokura (P)<br>Motoko Arakaki (P)<br>Ayumi Saito<br>Aiko Maejima<br>Asuka Kawachi<br>Rui Kitadai<br>Mai Onishi | National Cancer Center Hospital<br>5-1-1 Tsukiji, Chuo-ku, Tokyo,<br>104-0045, Japan |
| Hiroji Iwata                                                    | Masataka Sawaki<br>Haruru Kotani<br>Yayoi Adachi (P)<br>Sakura Onishi (P)<br>Madoka Iwase (P)<br>Kayoko Sugino (P)<br>Nanae Horisawa (P)<br>Makiko Mori (P)<br>Mitsuo Terada (P)<br>Masashi Ando<br>Yoshitaka Inaba<br>Yoshiko Murakami (P)<br>Akiyo Yoshimura<br>Naomi Gondo (P)<br>Yuri Ozaki<br>Ayumi Kataoka<br>Yuka Endo<br>Kazuki Nozawa<br>Shoko Sakamoto (P)<br>Masaya Hattori<br>Hosoda Waki                                                                                                                                          | Aichi Cancer Center<br>1-1 Kanokoden, Chikusa-ku,<br>Nagoya, Aichi, 464-8681, Japan  |

| Principal Investigator<br>(P) : Previous Principal Investigator | Sub-Investigator<br>(P) : Previous Sub-Investigator                                                                                                                                                                                                                                                                                                  | Study Conducted at Address(es)                                                                                                         |
|-----------------------------------------------------------------|------------------------------------------------------------------------------------------------------------------------------------------------------------------------------------------------------------------------------------------------------------------------------------------------------------------------------------------------------|----------------------------------------------------------------------------------------------------------------------------------------|
| Hiroyuki Yasojima<br>Norikazu Masuda (P)                        | Makiko Mizutani (P)<br>Hiroyuki Yasojima (P)<br>Yoko Otani (P)<br>Nozomi Morikawa (P)<br>Misato Hagi (P)<br>Masayuki Mano<br>Kiyoshi Mori<br>Kumiko Okada<br>Kaori Akazawa                                                                                                                                                                           | National Hospital Organization<br>Osaka National Hospital<br>2-1-14 Hoenzaka, Chuo-ku,<br>Osaka, 540-0006, Japan                       |
| Kenichi Watanabe<br>Masato Takahashi (P)                        | Kenichi Watanabe (P)<br>Nobumoto Tomioka<br>Masako Sato (P)<br>Mitsugu Yamamoto<br>Hideki Maeda<br>Sayuri Terai (Sayuri Kuwahara)<br>Hanae Tachikawa (P)<br>Katsushige Yamashiro (P)<br>Hiroaki Suzuki (P)<br>Yachiyo Iwamura (P)<br>Hanae Tachikawa (P)                                                                                             | National Hospital Organization<br>Hokkaido Cancer Center<br>2-3-54, Kikusui4jo, Shiraishi-ku,<br>Sapporo, Hokkaido, 003-0804,<br>Japan |
| Hirofumi Mukai                                                  | Toru Mukohara<br>Ako Hosono<br>Takahiro Kogawa (P)<br>Nobuaki Matsubara<br>Yoichi Naito<br>Kenichi Harano<br>Yumi Fujimoto (P)<br>Takeshi Kuwata<br>Satoshi Fujii (P)<br>Shota Kusuhara<br>Yoko Fukasawa (P)<br>Masako Inoue (P)<br>Chihiro kondoh<br>Chikako Funasaka<br>Takehiro Nakao<br>Hiromichi Nakajima<br>Misao Fukuda<br>Nobuyuki Takahashi | National Cancer Center Hospital<br>East<br>6-5-1 Kashiwanoha, Kashiwa,<br>Chiba, 277-8577, Japan                                       |
| Kenjiro Aogi                                                    | Shozo Ohsumi<br>Seiki Takashima (P)<br>Mina Takahashi<br>Fumitaka Hara (P)<br>Yuichiro Miyoshi<br>Mariko Kochi<br>Michiko Yamashita                                                                                                                                                                                                                  | National Hospital Organization<br>Shikoku Cancer Center<br>160 Minami Umemoto-machi Ko,<br>Matsuyama, Ehime, 791-0280,<br>Japan        |
| Naohito Yamamoto                                                | Rikiya Nakamura<br>Toshiko Miyaki<br>Rei Matsumoto (P)<br>Arihito Yoshizumi (P)<br>Hiroto Yamamoto (P)<br>Shoko Hayama<br>Itaru Sonoda (P)                                                                                                                                                                                                           | Chiba Cancer Center<br>666-2 Nitona-cho, Chuo-ku,<br>Chiba, Chiba, 260-8717, Japan                                                     |

| Principal Investigator<br>(P) : Previous Principal Investigator | Sub-Investigator<br>(P) : Previous Sub-Investigator                                                                                                                                                                                                                                                                                        | Study Conducted at Address(es)                                                            |
|-----------------------------------------------------------------|--------------------------------------------------------------------------------------------------------------------------------------------------------------------------------------------------------------------------------------------------------------------------------------------------------------------------------------------|-------------------------------------------------------------------------------------------|
|                                                                 | Tamanuki Tamaki<br>Yoshiaki Hyakutake (P)<br>Koya Fujii (P)                                                                                                                                                                                                                                                                                |                                                                                           |
| Toshinari Yamashita                                             | Takashi Yamanaka<br>Tatsuya Yoshida (P)<br>Nobuyasu Suganuma (P)<br>Haruhiko Yamazaki (P)<br>Daiji Nemoto (P)<br>Yuka Matsubara (P)<br>Tomoyuki Yokose<br>Yuko Sugawara (P)<br>Kaori Kohagura (P)<br>Soji Toda<br>Saki Okamoto<br>Ai Matsui (P)<br>Mio Yasukawa<br>Daisuke Murayama (P)<br>Saori Fujiwara<br>Akari Takahashi<br>Maya Isoda | Kanagawa Cancer Center<br>2-3-2 Nakao, Asahi-ku,<br>Yokohama, Kanagawa 241-8515,<br>Japan |
| Yuko Tanabe<br>Toshimi Takano (P)                               | Yuko Tanabe (P)<br>Chihiro Kondo (P)<br>Yukinori Ozaki (P)<br>Hidetaka Kawabata<br>Nobuko Tamura<br>Takuya Ogura (P)<br>Yoko Kobayashi<br>Jun Masuda (P)<br>Kiyoko Tanaka<br>Yuji Miura<br>Michiko Kurikawa (P)<br>Toshimi Takano<br>Rika Kizawa<br>Koichi Suyama<br>Takeshi Yamaguchi                                                     | Toranomon Hospital<br>2-2-2 Toranomon, Minato-ku,<br>Tokyo, 105-8470, Japan               |
| Koji Matsumoto                                                  | Takuma Onoe<br>Meiko Nishimura (P)<br>Shintaro Takao (P)<br>Kouichi Hirokaga<br>Kaori Tane<br>Kazuki Hashimoto (P)<br>Toshiko Sakuma<br>Hideki Sakai                                                                                                                                                                                       | Hyogo Cancer Center<br>13-70 Kitaoji-cho, Akashi Hyogo,<br>673-8558, Japan                |
| Tsutomu Iwasa<br>Junji Tsurutani (P)                            | Kazuhiko Nakagawa<br>Masayuki Takeda (P)<br>Hidetoshi Hayashi<br>Kaoru Tanaka<br>Tsutomu Iwasa (P)<br>Takeshi Yoshida<br>Tatsuya Okuno (P)<br>Hiroto Ueda (P)<br>Naoki Takegawa (P)                                                                                                                                                        | Kindai University Hospital<br>377-2 Ono-Higashi, Osaka<br>Sayama, Osaka 589-8511, Japan   |

| Principal Investigator<br>(P) : Previous Principal Investigator | Sub-Investigator<br>(P) : Previous Sub-Investigator                                                                                                                                                                                                                                                                                                                                                                                                                                                                                          | Study Conducted at Address(es)                                                                                 |
|-----------------------------------------------------------------|----------------------------------------------------------------------------------------------------------------------------------------------------------------------------------------------------------------------------------------------------------------------------------------------------------------------------------------------------------------------------------------------------------------------------------------------------------------------------------------------------------------------------------------------|----------------------------------------------------------------------------------------------------------------|
|                                                                 | Yoshikane Nonagase (P)<br>Satomi Watanabe (P)<br>Hisato Kawakami<br>Koji Haratani (P)<br>Ryoji Kato (P)<br>Hitomi Sakai (P)<br>Yoshifumi Komoike<br>Kimio Yonesaka<br>Shinichiro Suzuki<br>Junji Tsurutani (P)<br>Asuka Tsuya (P)<br>Soichi Fumita (P)<br>Hiroaki Kanemura<br>Seiichiro Mitani<br>Kosuke Isomoto<br>Chihiro Sato (P)<br>Takashi Kurosaki<br>Esuteru Hirokawa (P)<br>Junko Tanizaki<br>Takayuki Takahama<br>Chiaki Inagaki<br>Yusuke Kawanaka<br>Masaki Okura (P)<br>Tomohiro Nakayama<br>Toshiaki Takakura<br>Shuichi Murata |                                                                                                                |
| Eriko Tokunaga                                                  | Mayumi Ishida (P)<br>Yoshiaki Nakamura<br>Chinami Koga<br>Hideki Ichiji<br>Takanobu Masuda (P)<br>Wakako Tajiri<br>Masahiro Okamoto (P)<br>Hiroki Ueo (P)<br>Yumiko Koi                                                                                                                                                                                                                                                                                                                                                                      | National Hospital Organization<br>Kyusyu Cancer Center<br>3-1-1 Notame, Minami-ku,<br>Fukuoka, 811-1395, Japan |

### Republic of Korea

| Principal Investigator<br>(P) : Previous Principal Investigator | Sub-Investigator<br>(P) : Previous Sub-Investigator                                                   | Study Conducted at Address(es)                                                         |
|-----------------------------------------------------------------|-------------------------------------------------------------------------------------------------------|----------------------------------------------------------------------------------------|
| Joo Hyuk Sohn                                                   | Gun Min Kim (P)<br>Jee Hung Kim (P)<br>MinHwan Kim<br>Seul-Gi Kim (P)<br>Gun Min Kim<br>Chang Gon Kim | Severance Hospital<br>50-1 Yonsei-ro, Seodaemun-gu,<br>Seoul, 03722, Korea             |
| Kyung-Hun Lee<br>Seock-Ah Im (P)                                | Tae-You Kim (P)<br>Seock-Ah Im (P)<br>Do-Youn Oh (P)<br>Tae-Yong Kim (P)                              | Seoul National University Hospital<br>101 Daehak-ro, Jongno-gu, Seoul,<br>03080, Korea |

| Principal Investigator<br>(P) : Previous Principal Investigator | Sub-Investigator<br>(P) : Previous Sub-Investigator                                                                                                                                                                                                                                                                                                                                                                  | Study Conducted at Address(es)                                                                                                       |
|-----------------------------------------------------------------|----------------------------------------------------------------------------------------------------------------------------------------------------------------------------------------------------------------------------------------------------------------------------------------------------------------------------------------------------------------------------------------------------------------------|--------------------------------------------------------------------------------------------------------------------------------------|
|                                                                 | Dae-Won Lee (P)<br>Shin Hye Yoo (P)<br>Yeonjoo Choi (P)<br>Ja Yoon Heo (P)<br>Mi So Kim (P)<br>Sang-A Kim (P)<br>Sock-Won Yoon (P)<br>Go-un Woo (P)<br>JooHwan Park (P)<br>Sheehyun Kim (P)<br>Jung Sun Kim (P)<br>Ji Eun Park (P)<br>Chang-Bong Yang (P)<br>Jeesun Yoon (P)<br>Seul-Bi Lee (P)<br>Eun Hee Jung (P)<br>Song Yi Park (P)<br>Minsu Kang (P)<br>Jinyong Kim (P)<br>Jieun Yang (P)<br>Jeonghwan Youk (P) |                                                                                                                                      |
| KyungHae Jung                                                   | Jae Ho Jeong<br>Sung-Bae Kim<br>Jin-Hee Ahn<br>Jeong Eun Kim (P)<br>HyeHyun Jung                                                                                                                                                                                                                                                                                                                                     | Asan Medical Center<br>88 Olympic-ro 43-gil, Songpa-gu,<br>Seoul, 05505, Korea                                                       |
| Keun Seok Lee                                                   | In Hae Park (P)<br>Sung Hoon Sim (P)<br>Young Mee Kwon (P)<br>HeeJung Chae                                                                                                                                                                                                                                                                                                                                           | National Cancer Center<br>323 Ilsan-ro (809 Madu 1-dong),<br>Ilsandong-gu, Goyang-si,<br>Gyeonggi-do, 10408, Korea                   |
| Jee Hyun Kim (P)                                                | Se Hyun Kim (P)<br>Koung Jin Suh (P)                                                                                                                                                                                                                                                                                                                                                                                 | Seoul National University Bundang<br>Hospital<br>82, 173 beon-gil, Gumi-ro,<br>Bundang-gu, Seongnam-si,<br>Gyeonggi-do, 13620, Korea |
| Seok Yun Kang                                                   | Mi Sun Ahn                                                                                                                                                                                                                                                                                                                                                                                                           | Ajou University Hospital<br>164, World cup-ro, Yeongtong-gu,<br>Suwon-si, Gyeonggi-do, 16499,<br>Korea                               |

## Taiwan

| Principal Investigator<br>(P) : Previous Principal Investigator | Sub-Investigator<br>(P) : Previous Sub-Investigator                                                                 | Study Conducted at Address(es)                                                                          |
|-----------------------------------------------------------------|---------------------------------------------------------------------------------------------------------------------|---------------------------------------------------------------------------------------------------------|
| Yen-Shen Lu                                                     | Dwan-Ying Chang<br>Ching-Hung Lin<br>Wei-Wu Chen<br>Ming-Yang Wang<br>I-Chun Chen                                   | National Taiwan University Hospital<br>No. 7, Chung-Shan S. Rd., Taipei City, 100225, Taiwan            |
| Mei-Ching Liu (P)<br>Chi-Feng Chung                             | Nei-Min Chu<br>Chi-Feng Chung (P)                                                                                   | Koo Foundation Sun Yat-Sen Cancer Center<br>125, Lih-Der Road, Pei-Tou District, Taipei, 112019, Taiwan |
| Ling-Ming Tseng                                                 | Kuang-Liang King (P)<br>Jen-Hwey Chiu<br>Yi-Fang Tsai<br>Yen-Shu Lin<br>Ta-Chung Chao<br>Chun-Yu Liu<br>Yi-Chen Lai | Taipei Veterans General Hospital<br>201, Shih-Pai Road, Sec.2, Taipei, 112201, Taiwan                   |

## Singapore

| Principal Investigator<br>(P) : Previous Principal Investigator | Sub-Investigator<br>(P) : Previous Sub-Investigator                                                                                                                                                                  | Study Conducted at Address(es)                                           |
|-----------------------------------------------------------------|----------------------------------------------------------------------------------------------------------------------------------------------------------------------------------------------------------------------|--------------------------------------------------------------------------|
| Yap Yoon Sim                                                    | Rebecca Dent<br>Beh Sok Yuen<br>Chay Wen Yee<br>Lim Hsuen, Elaine<br>Loh Wei-Jen, Kiley (P)<br>Mabel Wong<br>Chan Junjie, Jack<br>Chew Lee Lian<br>Ho Teng Swan, Juliana<br>Ng Chee Hu, Raymond<br>Huren Sivaraj (P) | National Cancer Centre Singapore<br>11 Hospital Drive, Singapore, 169610 |
| Soo Chin Lee                                                    | Yvonne Ang<br>Joan Choo                                                                                                                                                                                              | National University Hospital                                             |

| Principal Investigator<br>(P) : Previous Principal Investigator | Sub-Investigator<br>(P) : Previous Sub-Investigator                                                              | Study Conducted at Address(es)                                        |
|-----------------------------------------------------------------|------------------------------------------------------------------------------------------------------------------|-----------------------------------------------------------------------|
|                                                                 | Matilda Lee<br>Gloria Chan<br>Natalie Ngoi<br>Anea Wong<br>Samuel Ow<br>Lim Yi Wan<br>Lim Siew Eng<br>Joline Lim | 1E Kent Ridge Road, NUHS<br>Tower Block Level 7, Singapore,<br>119228 |



## Supplementary Figure 1. Trial design.

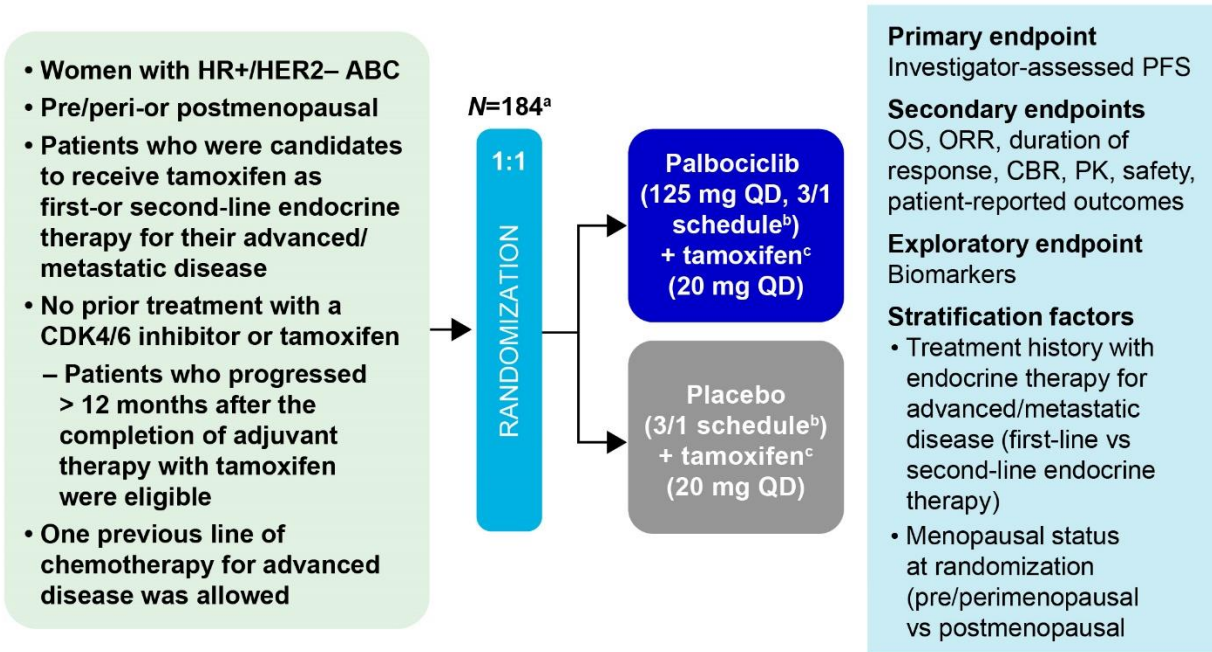

<sup>a</sup>Actual.

<sup>b</sup>3/1 schedule defined as 3 weeks on and 1 week off therapy.

<sup>c</sup>Pre/perimenopausal women additionally received luteinizing hormone-releasing hormone agonist (goserelin).

ABC, advanced breast cancer; CBR, clinical benefit rate; CDK4/6, cyclin-dependent kinase 4/6; HER2, human epidermal growth factor receptor 2; HR, hormone receptor; ORR, objective response rate; OS, overall survival; PFS, progression-free survival; PK, pharmacokinetics; QD, once daily.

**Supplementary Table 1.** Best overall response based on investigator assessment.

| Treatment Group       | n  | Best Overall Response Based on Investigator Assessment,<br>n (%) |           |           |           |         | Response Rate,<br>n (%) (95%CI) <sup>a</sup> | Odds Ratio<br>(95% CI) <sup>b</sup> |
|-----------------------|----|------------------------------------------------------------------|-----------|-----------|-----------|---------|----------------------------------------------|-------------------------------------|
|                       |    | CR                                                               | PR        | SD        | PD        | NE      |                                              |                                     |
| Palbociclib-Tamoxifen | 91 | 2 (2.2)                                                          | 38 (41.8) | 41 (45.1) | 4 (4.4)   | 6 (6.6) | 40 (44.0) (33.56–54.75)                      | 2.02 (1.095–3.727)                  |
| Placebo-Tamoxifen     | 93 | 2 (2.2)                                                          | 24 (25.8) | 45 (48.4) | 21 (22.6) | 1 (1.1) | 26 (28.0) (19.14–38.22)                      |                                     |

<sup>a</sup>Clopper Pearson method.

<sup>b</sup>Stratified odds ratio adjusted by the treatment history with endocrine therapy for advanced/metastatic disease and menopausal status at randomization.

CI, confidence interval; CR, complete response; NE, not evaluable; PD, progressive disease; PR, partial response; SD, stable disease.

**Supplementary Table 2.** Serious adverse events related to study treatment, by severity grade and type.

| Serious adverse event             | Palbociclib–Tamoxifen Group (n=91) |                |                | Placebo–Tamoxifen Group (n=93) |                |                |
|-----------------------------------|------------------------------------|----------------|----------------|--------------------------------|----------------|----------------|
|                                   | Any grade, n (%)                   | Grade 3, n (%) | Grade 4, n (%) | Any grade, n (%)               | Grade 3, n (%) | Grade 4, n (%) |
| <b>Any serious adverse events</b> | 2 (2.2)                            | 1 (1.1)        | 0              | 3 (3.2)                        | 1 (1.1)        | 1 (1.1)        |
| <b>Gastric ulcer</b>              | 1 (1.1)                            | 0              | 0              | 0                              | 0              | 0              |
| <b>Peripheral swelling</b>        | 0                                  | 0              | 0              | 1 (1.1)                        | 0              | 0              |
| <b>Cellulitis</b>                 | 1 (1.1)                            | 1 (1.1)        | 0              | 0                              | 0              | 0              |
| <b>Erysipelas</b>                 | 1 (1.1)                            | 1 (1.1)        | 0              | 0                              | 0              | 0              |
| <b>Hypokalemia</b>                | 0                                  | 0              | 0              | 1 (1.1)                        | 1 (1.1)        | 0              |
| <b>Hyponatremia</b>               | 0                                  | 0              | 0              | 1 (1.1)                        | 0              | 1 (1.1)        |
| <b>Pulmonary embolism</b>         | 0                                  | 0              | 0              | 1 (1.1)                        | 1 (1.1)        | 0              |

Adverse events were graded by CTCAE v4.0.

Patient with more than one adverse event within the same level of MedDRA term was counted as one in its maximum grade.

CTCAE, Common Terminology Criteria for Adverse Events; MedDRA, Medical Dictionary for Regulatory Activities.

**Supplementary Table 3.** Adverse events leading to treatment discontinuation, by severity grade and type.

| Adverse event leading to discontinuation            | Palbociclib–Tamoxifen Group (n=91) |                |                | Placebo–Tamoxifen Group (n=93) |                |                |
|-----------------------------------------------------|------------------------------------|----------------|----------------|--------------------------------|----------------|----------------|
|                                                     | Any grade, n (%)                   | Grade 3, n (%) | Grade 4, n (%) | Any grade, n (%)               | Grade 3, n (%) | Grade 4, n (%) |
| <b>Any adverse event leading to discontinuation</b> | 3 (3.3)                            | 1 (1.1)        | 2 (2.2)        | 2 (2.2)                        | 1 (1.1)        | 0              |
| <b>Septic shock</b>                                 | 1 (1.1)                            | 0              | 1 (1.1)        | 0                              | 0              | 0              |
| <b>Femur fracture</b>                               | 1 (1.1)                            | 1 (1.1)        | 0              | 0                              | 0              | 0              |
| <b>Neutrophil count decreased</b>                   | 1 (1.1)                            | 0              | 1 (1.1)        | 0                              | 0              | 0              |
| <b>Thyroid cancer</b>                               | 0                                  | 0              | 0              | 1 (1.1)                        | 1 (1.1)        | 0              |
| <b>Dizziness</b>                                    | 0                                  | 0              | 0              | 1 (1.1)                        | 0              | 0              |

Adverse events were graded by CTCAE v4.0.

Patient with more than one adverse event within the same level of MedDRA term was counted as one in its maximum grade.

CTCAE, Common Terminology Criteria for Adverse Events; MedDRA, Medical Dictionary for Regulatory Activities.

**Supplementary Table 4.** Follow-up anticancer therapy received by 3% or more of patients in either treatment group.

|                                                | Palbociclib–<br>Tamoxifen<br><i>n</i> =91<br><i>n</i> (%) | Placebo–<br>Tamoxifen<br><i>n</i> =93<br><i>n</i> (%) | Total<br><i>N</i> =184<br><i>n</i> (%) |
|------------------------------------------------|-----------------------------------------------------------|-------------------------------------------------------|----------------------------------------|
| <b>Any therapy</b>                             | 64 (70.3)                                                 | 80 (86.0)                                             | 144 (78.3)                             |
| <b>Any first subsequent therapy</b>            | 64 (70.3)                                                 | 80 (86.0)                                             | 144 (78.3)                             |
| Fulvestrant                                    | 11 (12.1)                                                 | 7 (7.5)                                               | 18 (9.8)                               |
| Tamoxifen citrate                              | 7 (7.7)                                                   | 11 (11.8)                                             | 18 (9.8)                               |
| Abemaciclib, letrozole                         | 3 (3.3)                                                   | 8 (8.6)                                               | 11 (6.0)                               |
| Letrozole                                      | 5 (5.5)                                                   | 5 (5.4)                                               | 10 (5.4)                               |
| Palbociclib, fulvestrant                       | 3 (3.3)                                                   | 6 (6.5)                                               | 9 (4.9)                                |
| Abemaciclib, fulvestrant                       | 2 (2.2)                                                   | 6 (6.5)                                               | 8 (4.3)                                |
| Anastrozole                                    | 5 (5.5)                                                   | 2 (2.2)                                               | 7 (3.8)                                |
| Everolimus, exemestane                         | 5 (5.5)                                                   | 2 (2.2)                                               | 7 (3.8)                                |
| Tegafur/gimeracil/oteracil potassium           | 3 (3.3)                                                   | 1 (1.1)                                               | 4 (2.2)                                |
| Palbociclib, letrozole                         | 0                                                         | 4 (4.3)                                               | 4 (2.2)                                |
| Paclitaxel                                     | 0                                                         | 3 (3.2)                                               | 3 (1.6)                                |
| <b>Any second subsequent therapy</b>           | 38 (41.8)                                                 | 53 (57.0)                                             | 91 (49.5)                              |
| Everolimus, exemestane                         | 2 (2.2)                                                   | 5 (5.4)                                               | 7 (3.8)                                |
| Fulvestrant                                    | 5 (5.5)                                                   | 1 (1.1)                                               | 6 (3.3)                                |
| Capecitabine                                   | 1 (1.1)                                                   | 5 (5.4)                                               | 6 (3.3)                                |
| Tegafur/gimeracil/oteracil potassium           | 4 (4.4)                                                   | 1 (1.1)                                               | 5 (2.7)                                |
| Abemaciclib, fulvestrant                       | 2 (2.2)                                                   | 3 (3.2)                                               | 5 (2.7)                                |
| Paclitaxel                                     | 2 (2.2)                                                   | 3 (3.2)                                               | 5 (2.7)                                |
| Exemestane                                     | 1 (1.1)                                                   | 3 (3.2)                                               | 4 (2.2)                                |
| Palbociclib                                    | 0                                                         | 4 (4.3)                                               | 4 (2.2)                                |
| <b>Any third or greater subsequent therapy</b> | 31 (34.1)                                                 | 42 (45.2)                                             | 73 (39.7)                              |
| Capecitabine                                   | 8 (8.8)                                                   | 8 (8.6)                                               | 16 (8.7)                               |
| Eribulin mesylate                              | 6 (6.6)                                                   | 6 (6.5)                                               | 12 (6.5)                               |
| Everolimus, exemestane                         | 1 (1.1)                                                   | 10 (10.8)                                             | 11 (6.0)                               |
| Eribulin                                       | 4 (4.4)                                                   | 6 (6.5)                                               | 10 (5.4)                               |
| Tegafur/gimeracil/oteracil potassium           | 5 (5.5)                                                   | 2 (2.2)                                               | 7 (3.8)                                |
| Vinorelbine tartrate                           | 4 (4.4)                                                   | 3 (3.2)                                               | 7 (3.8)                                |
| Paclitaxel                                     | 4 (4.4)                                                   | 2 (2.2)                                               | 6 (3.3)                                |
| Gemcitabine hydrochloride                      | 2 (2.2)                                                   | 4 (4.3)                                               | 6 (3.3)                                |

|                                                         |         |         |         |
|---------------------------------------------------------|---------|---------|---------|
| Bevacizumab, paclitaxel                                 | 3 (3.3) | 2 (2.2) | 5 (2.7) |
| Abemaciclib, fulvestrant                                | 3 (3.3) | 1 (1.1) | 4 (2.2) |
| Cyclophosphamide monohydrate, doxorubicin hydrochloride | 1 (1.1) | 3 (3.2) | 4 (2.2) |
| Letrozole                                               | 1 (1.1) | 3 (3.2) | 4 (2.2) |
| Gemcitabine hydrochloride, paclitaxel                   | 0       | 4 (4.3) | 4 (2.2) |

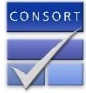

## CONSORT 2010 checklist of information to include when reporting a randomised trial\*

| Section/Topic             | Item No | Checklist item                                                                                                                        | Reported on page No |
|---------------------------|---------|---------------------------------------------------------------------------------------------------------------------------------------|---------------------|
| <b>Title and abstract</b> |         |                                                                                                                                       |                     |
|                           | 1a      | Identification as a randomised trial in the title                                                                                     | Abstract on pg 3    |
|                           | 1b      | Structured summary of trial design, methods, results, and conclusions (for specific guidance see CONSORT for abstracts)               | 3                   |
| <b>Introduction</b>       |         |                                                                                                                                       |                     |
| Background and objectives | 2a      | Scientific background and explanation of rationale                                                                                    | 4                   |
|                           | 2b      | Specific objectives or hypotheses                                                                                                     | 4                   |
| <b>Methods</b>            |         |                                                                                                                                       |                     |
| Trial design              | 3a      | Description of trial design (such as parallel, factorial) including allocation ratio                                                  | 12                  |
|                           | 3b      | Important changes to methods after trial commencement (such as eligibility criteria), with reasons                                    | Protocol            |
| Participants              | 4a      | Eligibility criteria for participants                                                                                                 | 12, 13              |
|                           | 4b      | Settings and locations where the data were collected                                                                                  | 12                  |
| Interventions             | 5       | The interventions for each group with sufficient details to allow replication, including how and when they were actually administered | 13                  |
| Outcomes                  | 6a      | Completely defined pre-specified primary and secondary outcome measures, including how and when they were assessed                    | 14                  |
|                           | 6b      | Any changes to trial outcomes after the trial commenced, with reasons                                                                 | Protocol            |
| Sample size               | 7a      | How sample size was determined                                                                                                        | 15                  |
|                           | 7b      | When applicable, explanation of any interim analyses and stopping guidelines                                                          | NA                  |
| Randomisation:            | 8a      | Method used to generate the random allocation sequence                                                                                | 13                  |

|                                                      |     |                                                                                                                                                                                             |          |
|------------------------------------------------------|-----|---------------------------------------------------------------------------------------------------------------------------------------------------------------------------------------------|----------|
| Sequence generation                                  | 8b  | Type of randomisation; details of any restriction (such as blocking and block size)                                                                                                         | 13       |
| Allocation concealment mechanism                     | 9   | Mechanism used to implement the random allocation sequence (such as sequentially numbered containers), describing any steps taken to conceal the sequence until interventions were assigned | 13       |
| Implementation                                       | 10  | Who generated the random allocation sequence, who enrolled participants, and who assigned participants to interventions                                                                     | 13       |
| Blinding                                             | 11a | If done, who was blinded after assignment to interventions (for example, participants, care providers, those assessing outcomes) and how                                                    | 12       |
|                                                      | 11b | If relevant, description of the similarity of interventions                                                                                                                                 | NA       |
| Statistical methods                                  | 12a | Statistical methods used to compare groups for primary and secondary outcomes                                                                                                               | 15       |
|                                                      | 12b | Methods for additional analyses, such as subgroup analyses and adjusted analyses                                                                                                            | 15       |
| <b>Results</b>                                       |     |                                                                                                                                                                                             |          |
| Participant flow (a diagram is strongly recommended) | 13a | For each group, the numbers of participants who were randomly assigned, received intended treatment, and were analysed for the primary outcome                                              | Figure 1 |
|                                                      | 13b | For each group, losses and exclusions after randomisation, together with reasons                                                                                                            | Figure 1 |
| Recruitment                                          | 14a | Dates defining the periods of recruitment and follow-up                                                                                                                                     | 13, 14   |
|                                                      | 14b | Why the trial ended or was stopped                                                                                                                                                          | NA       |
| Baseline data                                        | 15  | A table showing baseline demographic and clinical characteristics for each group                                                                                                            | Table 1  |
| Numbers analysed                                     | 16  | For each group, number of participants (denominator) included in each analysis and whether the analysis was by original assigned groups                                                     | Figures  |
| Outcomes and estimation                              | 17a | For each primary and secondary outcome, results for each group, and the estimated effect size and its precision (such as 95% confidence interval)                                           | 5 to 7   |
|                                                      | 17b | For binary outcomes, presentation of both absolute and relative effect sizes is recommended                                                                                                 | NA       |



|                          |    |                                                                                                                                           |            |
|--------------------------|----|-------------------------------------------------------------------------------------------------------------------------------------------|------------|
| Ancillary analyses       | 18 | Results of any other analyses performed, including subgroup analyses and adjusted analyses, distinguishing pre-specified from exploratory | 7, 8       |
| Harms                    | 19 | All important harms or unintended effects in each group (for specific guidance see CONSORT for harms)                                     | 7, 8       |
| <b>Discussion</b>        |    |                                                                                                                                           |            |
| Limitations              | 20 | Trial limitations, addressing sources of potential bias, imprecision, and, if relevant, multiplicity of analyses                          | 9 to 12    |
| Generalisability         | 21 | Generalisability (external validity, applicability) of the trial findings                                                                 | 9 to 12    |
| Interpretation           | 22 | Interpretation consistent with results, balancing benefits and harms, and considering other relevant evidence                             | 9 to 12    |
| <b>Other information</b> |    |                                                                                                                                           |            |
| Registration             | 23 | Registration number and name of trial registry                                                                                            | 3          |
| Protocol                 | 24 | Where the full trial protocol can be accessed, if available                                                                               | Supplement |
| Funding                  | 25 | Sources of funding and other support (such as supply of drugs), role of funders                                                           | 16         |

Citation: Schulz KF, Altman DG, Moher D, for the CONSORT Group. CONSORT 2010 Statement: updated guidelines for reporting parallel group randomised trials. BMC Medicine. 2010;8:18.

© 2010 Schulz et al. This is an Open Access article distributed under the terms of the Creative Commons Attribution License

(<http://creativecommons.org/licenses/by/2.0>), which permits unrestricted use, distribution, and reproduction in any medium, provided the original work is properly cited.

\*We strongly recommend reading this statement in conjunction with the CONSORT 2010 Explanation and Elaboration for important clarifications on all the items. If relevant, we also recommend reading CONSORT extensions for cluster randomised trials, non-inferiority and equivalence trials, non-pharmacological treatments, herbal interventions, and pragmatic trials. Additional extensions are forthcoming: for those and for up-to-date references relevant to this checklist, see [www.consort-statement.org](http://www.consort-statement.org).
